# Supplementary material
Source: PubMed Central journal article supplement (PMC6913166)
Supplement: Supp_Figure1.pdf [file Supp_Figure1.pdf]

## Supplementary Data

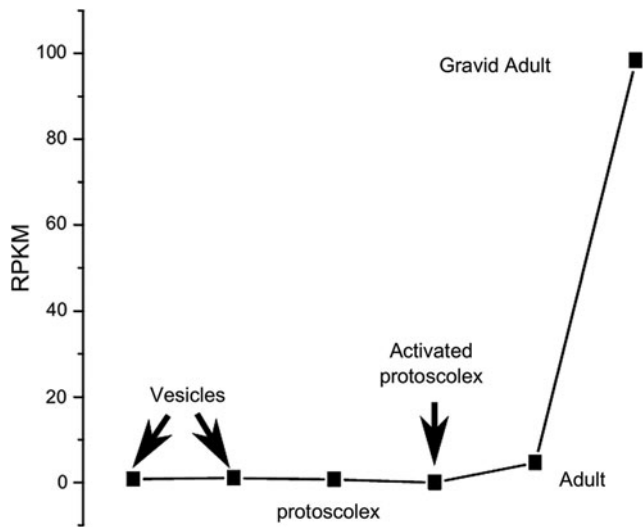

**SUPPLEMENTARY FIG. S1. Transcription profiles of IsTRP from gravid adult, adult, activated protoscolex, protoscolex, and vesicles of *Echinococcus multilocularis*.** Transcriptome analysis was performed by the Parasite Genomics platform in the Wellcome Trust Sanger Institute. The data are presented as reads per kilobase per million mapped reads (RPKM). IsTRP, iron-sulfur thioredoxin-related protein.
