# Supplementary material
Source: PubMed Central journal article supplement (PMC6913166)
Supplement: Supp_Figure2.pdf [file Supp_Figure2.pdf]

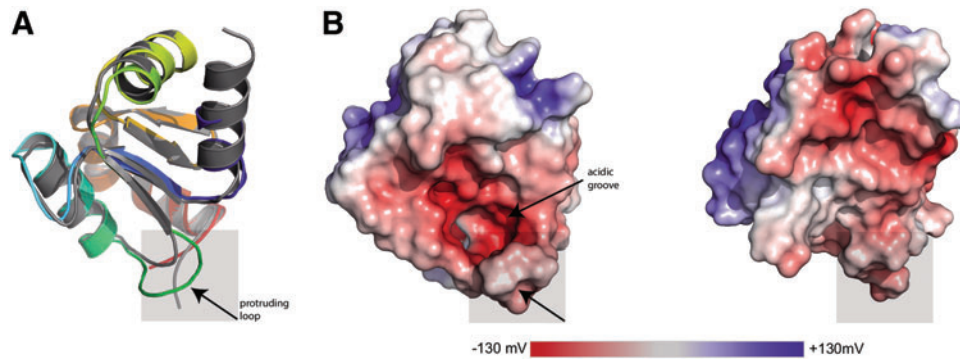

**SUPPLEMENTARY FIG. S2. Structure homology comparison of Grx5 from *Saccharomyces cerevisiae* and *Echinococcus granulosus*.** (A) Cartoon representation of a homology model for EgGrx5 3D structure. EgGrx5 is color coded from *blue* to *red* for N-terminal and C-terminal and superposed to yeast Grx5 (*gray cartoon*; PDB access code: 3gx8). The extended loop discussed in the text is pointed by an *arrow* within a shaded square and has multiple possible conformations (an average loop is depicted, *green* region). (B) van der Waals representation of EgGrx5 (*left*) and yeast Grx5 (*right*) monomers showing electrostatic surfaces. An acidic groove present only in EgGrx5 is indicated. Grx, glutaredoxin.
