# Supplementary material
Source: PubMed Central journal article supplement (PMC6913166)
Supplement: Supp_Figure3.pdf [file Supp_Figure3.pdf]

> EgGrx5  
MSP  
MLLRAFSKLRILPLSAVRLAQQGSVSFLHSSTLLVQFSKTVRPTFAALPTRISVRS  
Grx domain  
SSEASSPPELDKALRNRLTELTCTRVVVLKGDPM**EP**RC**GFS**NAVCRILEA  
Grx domain  
HGVLGKNDPATGAPLLSSFDVLS**DSEV**REAAKLFSDWPTFPQVFFDGEFIGG  
Grx domain  
CDILLDMHRSGKLAELERRGIGSLLNEKEKGKKN-

**SUPPLEMENTARY FIG. S3. Full sequence of *E. granulosus* Grx5.** The full amino acid sequence of Grx5 is shown. The sequence encoded in the expression plasmid for the recombinant protein (pH08, see Supplementary Table S1) is shown in bold. The active site is highlighted in *gray* and the predicted MSP and the Grx domain are also shown. MSP, mitochondrial signal peptide.
