# Supplementary material
Source: PubMed Central journal article supplement (PMC6913166)
Supplement: Supp_Figure5.pdf [file Supp_Figure5.pdf]

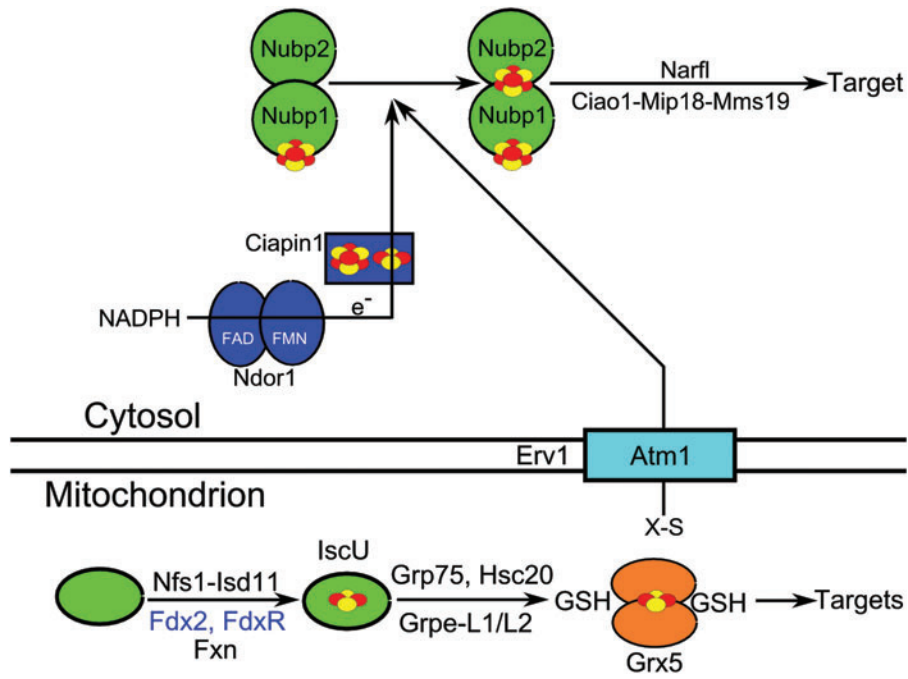

**SUPPLEMENTARY FIG. S5. Illustration of Fe/S synthesis machinery in mammals.** This figure was adapted from Lill *et al.* (25). X-S represents the sulfur-containing moiety exported from the mitochondria, and sulfur and iron atoms are represented in *yellow* and *red*, respectively. Scaffold proteins are shown in *green* and proteins involved in electron transport in *blue*. Fe/S, iron-sulfur cluster.
