# Supplementary material
Source: PubMed Central journal article supplement (PMC6913166)
Supplement: Supp_Table1.pdf [file Supp_Table1.pdf]

**Table S1. Plasmids and DNA constructs employed and generated in this work.**

| Construct | Vector | Eg gene | Primer pair/s                                                                                                                       | Comments                                                                                                                    |
|-----------|--------|---------|-------------------------------------------------------------------------------------------------------------------------------------|-----------------------------------------------------------------------------------------------------------------------------|
|           | pET28a | -       | -                                                                                                                                   |                                                                                                                             |
|           | pMM221 | -       | -                                                                                                                                   | Doxycycline controlled tTA transactivator, tetO2 promoter regions, C-terminal HA3/His6 and MTS of <i>S. cerevisiae</i> Grx5 |
| pH08      | pET28a | Grx5    | <u>GGATCC</u> ACATTCGCGGCTCTACCG<br><u>AAGCTT</u> TTAATTTTCTCCCTTCTC                                                                | Residue 43 to 194                                                                                                           |
| pH14      | pET28a | IsTrx   | <u>GGATCC</u> ATGCCCGAGATTTTG<br><u>AAGCTT</u> TTAGAAAAGAATTGAAAAAAGCG                                                              | wild type                                                                                                                   |
| pH16      | pET28a | IsTrx   | <u>GGATCC</u> ATGCCCGAGATTTTG<br><u>AAGCTT</u> TTAGAAAAGAATTGAAAAAAGCG<br>GCTTTGCATCCTGTTTTGCC<br>GGCAAACAGGATGCAAAGC               | CxxSC mutant                                                                                                                |
| pH18      | pET28a | IsTrx   | <u>GGATCC</u> ATGCCCGAGATTTTG<br><u>AAGCTT</u> TTAGAAAAGAATTGAAAAAAGCG<br>GACAACTCCTTTGCATGCTGTTTTG<br>CAAACAGCATGCAAAGGAGTTTGTC    | SxxCC mutant                                                                                                                |
| pH19      | pET28a | IsTrx   | <u>GGATCC</u> ATGCCCGAGATTTTG<br><u>AAGCTT</u> TTAGAAAAGAATTGAAAAAAGCG<br>CTGCTTTGCATGCTCTTTTGCCGAAAG<br>CTTTCGGCAAAGAGCATGCAAAGCAG | CxxCS mutant                                                                                                                |
| pH20      | pMM221 | Grx5    | <u>GCGGCCG</u> CCTGGACAAGGCGCTCCGCAAC<br><u>CTGCAG</u> ATTTTTCTCCCTTCTCCCT                                                          | Residues 65 to 194                                                                                                          |
| pH21      | pMM221 | IsTrx   | <u>GCGGCCG</u> CATGCCCGAGATTTTGAAAATC<br><u>CTGCAG</u> GAAAGAATTGAAAAAAGCGTC                                                        | Residues 1 to 106                                                                                                           |

Restriction sites sequences are underlined.
