# Supplementary material
Source: PubMed Central journal article supplement (PMC6913166)
Supplement: Supp_Table2.pdf [file Supp_Table2.pdf]

**Table S2. Yeast strains employed in this work.**

| Strain  | Relevant phenotype                                           | Comments/Reference                      |
|---------|--------------------------------------------------------------|-----------------------------------------|
| W303-1A | MATa <i>ura3-1 ade2-1 leu2-3,112 trp1-1 his3-11,15</i>       | Wild-type                               |
| W303-1B | As W303-1A but MAT $\alpha$                                  | Wild-type                               |
| MML289  | MAT $\alpha$ <i>grx5::kanMX4</i>                             | (13)                                    |
| MML240  | MATa <i>grx5::kanMX4 pMM54(ScGRX5-3HA)::LEU2</i>             | (29)                                    |
| pL1     | MATa [pMM221::LEU2]                                          | Integration of linear pMM221 in W303-1A |
| gL1     | MATa [pMM221(EgGRX5-3HA) ]::LEU2                             | Integration of linear pH20 in W303-1A   |
| tL1     | MATa [pMM221(EgGRX5-3HA) ]::LEU2                             | Integration of linear pH21 in W303-1A   |
| pL2     | MATa <i>grx5::kanMX4</i> [pMM221::LEU2]                      | Spore from a cross MML289XpL1           |
| gL2     | MATa <i>grx5::kanMX4</i> [pMM221(EgGRX5-3HA) ]::LEU2         | Spore from a cross MML289XgL1           |
| tL2     | MAT $\alpha$ <i>grx5::kanMX4</i> [pMM221(EgGRX5-3HA) ]::LEU2 | Spore from a cross MML289XtL1           |
